# Supplementary material for: YAP/TAZ regulates TGF-β/Smad3 signaling by induction of Smad7 via AP-1 in human skin dermal fibroblasts
Source: PubMed Central journal article supplement (PMC5918965; doi:10.1186/s12964-018-0232-3), 2018-04-25
Supplement: 12964_2018_232_MOESM1_ESM.pdf [file 12964_2018_232_MOESM1_ESM.pdf]

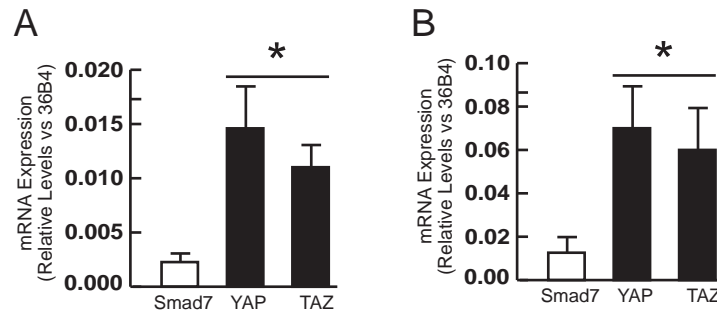

Figure S1

**Smad7, YAP, and TAZ mRNA expression in human skin dermis *in vivo* and primary dermal fibroblasts *in vitro*.** (A) Human skin dermis was prepared by cutting off epidermis at a depth of 1mm by cryostat. Dermal total RNA was prepared using a commercial kit (RNeasy midikit, Qiagen, Chatsworth, CA). N=8. (B) Total RNA from primary dermal fibroblasts was extracted using TRIzol reagent (Invitrogen, Carlsbad, CA). N=3 mRNA levels for Smad7, YAP, and TAZ were determined by real-time RT-PCR. mRNA levels were normalized to mRNA for 36B4, a ribosomal protein used as an internal control for quantitation. Data are expressed as mean $\pm$ SEM, \*p<0.05 vs Smad7.

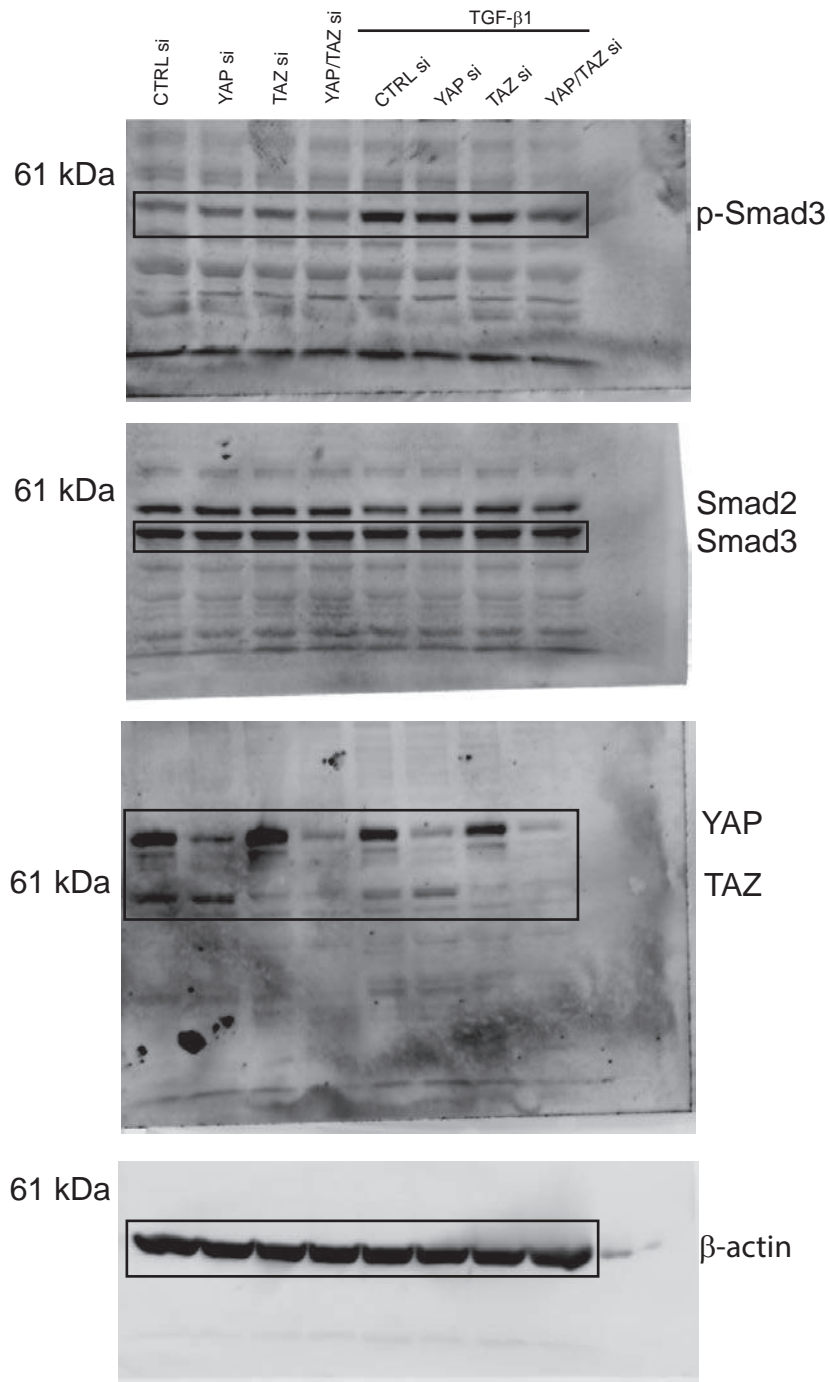

**Figure S2.** Full-length Western blots for Figure1A.

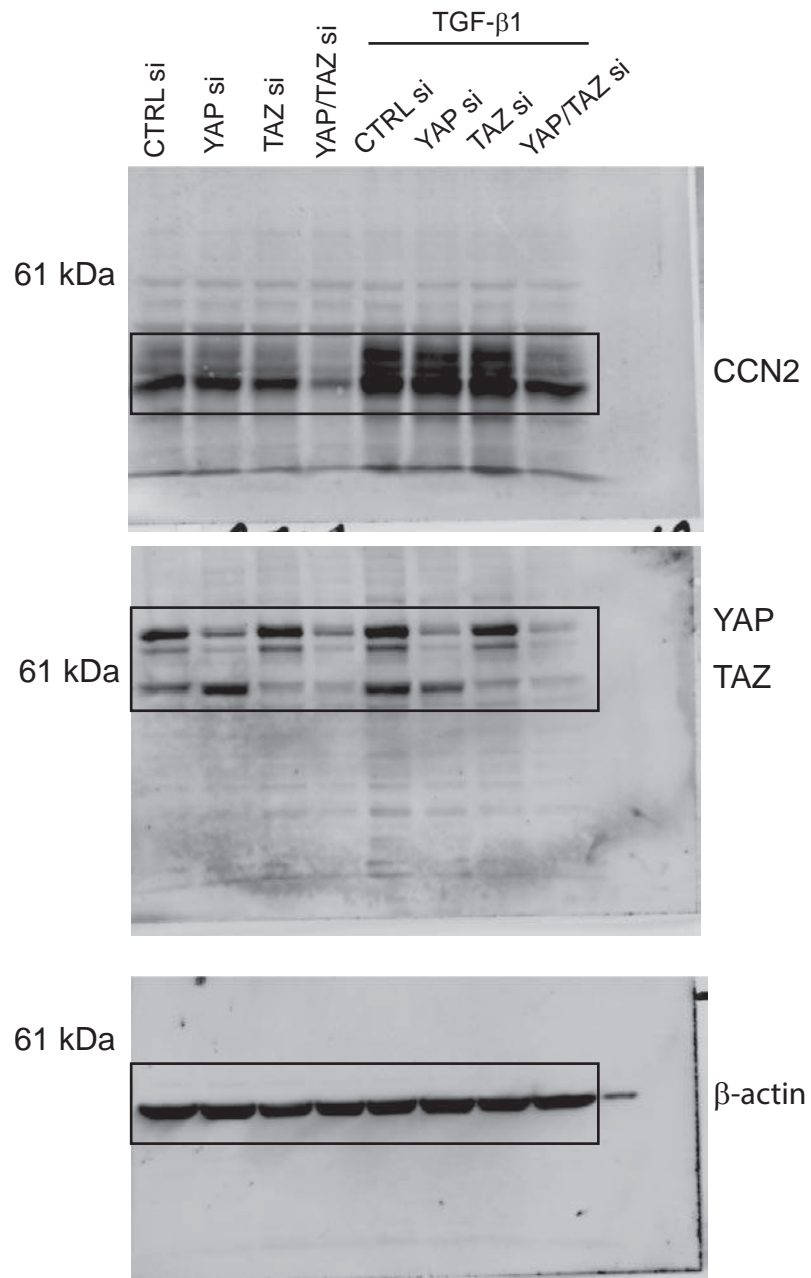

**Figure S3.** Full-length Western blots for Figure 2B.

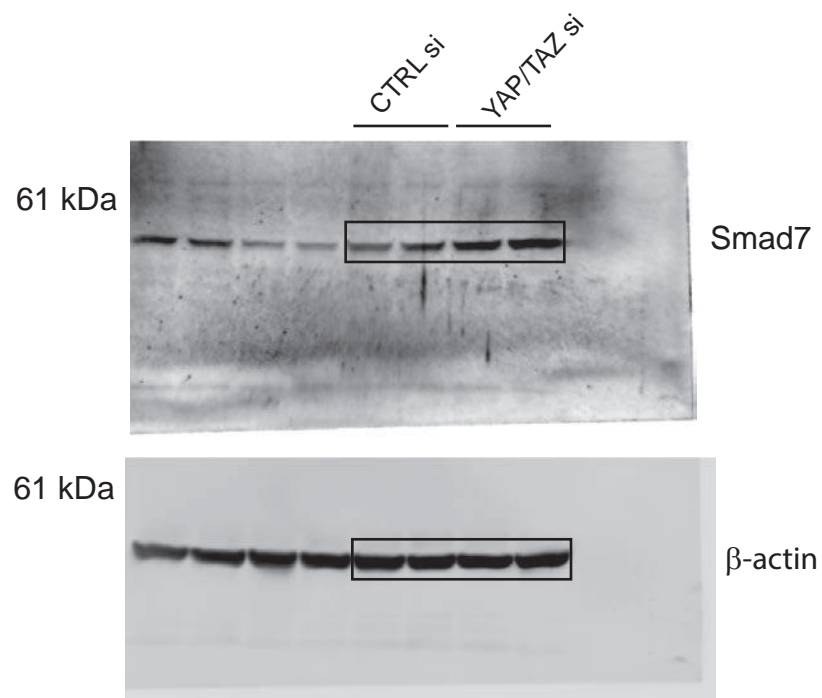

**Figure S4.** Full-length Western blots for Figure 3B.

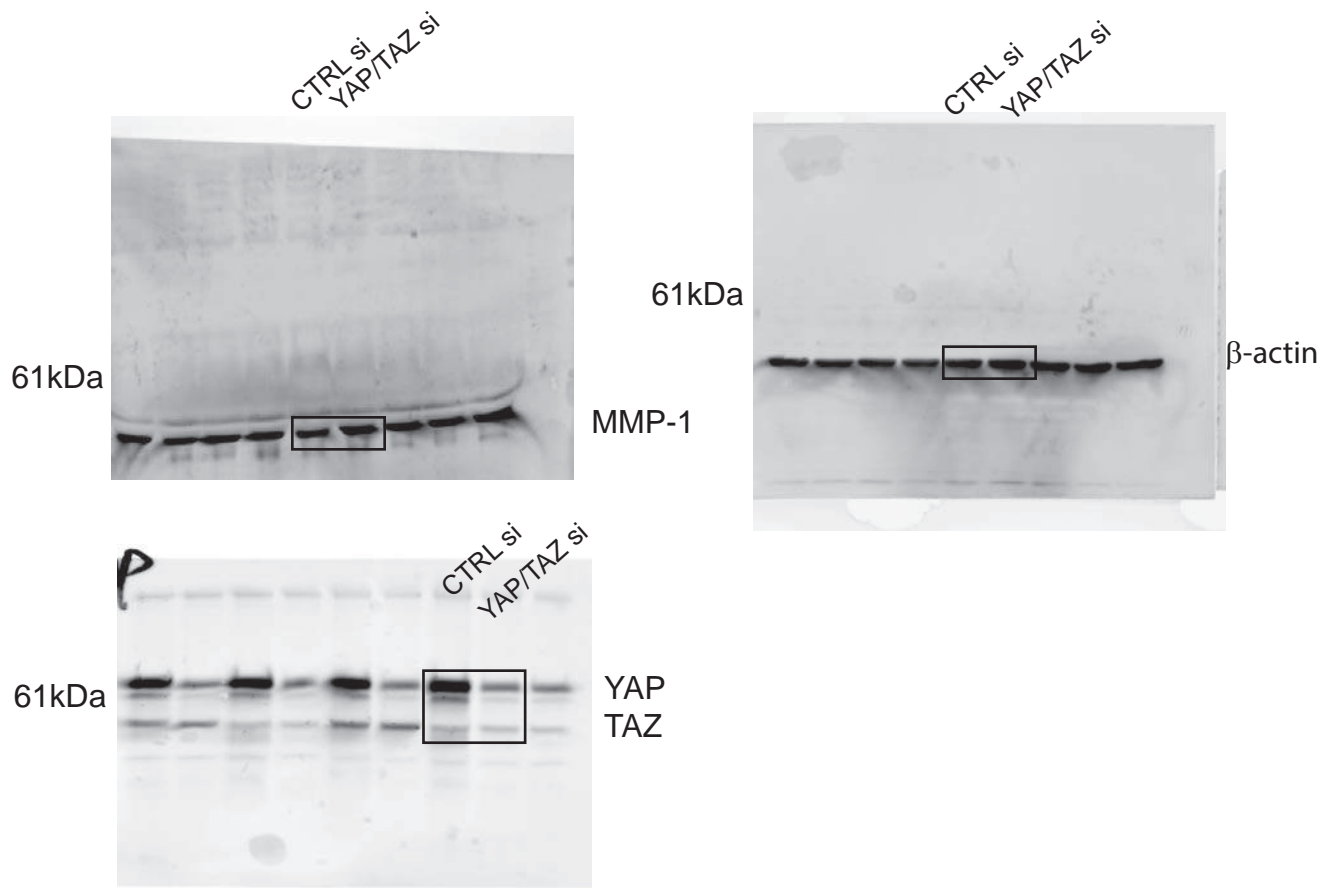

**Figure S5A.** Full-length Western blots for Figure 5D.

|   |   |   |   |            |   |   |   |   |   |   |            |
|---|---|---|---|------------|---|---|---|---|---|---|------------|
| + | - | - | - | CTRL si    | + | + | + | - | - | - | CTRL si    |
| - | + | + | + | YAP/TAZ si | - | - | - | + | + | + | YAP/TAZ si |
| - | - | + | - | AP-1 wt    | - | + | - | - | + | - | Smad3 Ab   |
| - | - | - | + | AP-1 mut   | - | - | + | - | - | + | IgG        |

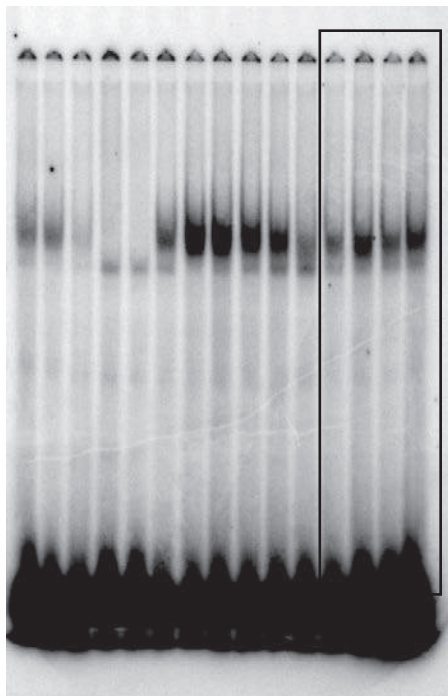

**Figure S5B**  
Full-length Western blots for Figure 5F.

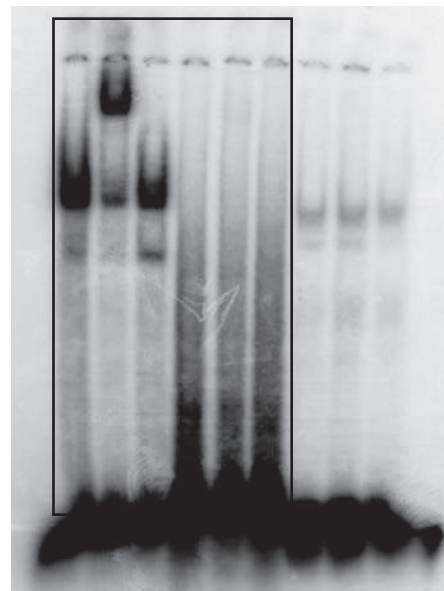

**Figure S5C**  
Full-length Western blots for Figure 5G.

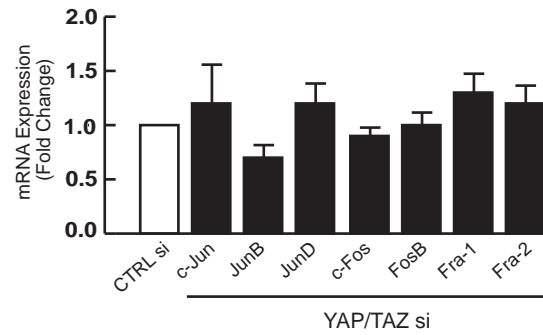

## Figure S6

### **YAP/TAZ knockdown did not alter AP-1 family transcription factors mRNA expression.**

Primary dermal fibroblasts were transfected with non-specific control siRNA or YAP/TAZ siRNAs (400nM) for 48 hours. AP-1 family transcription factors mRNA levels were quantified by real-time RT-PCR. mRNA levels were normalized to mRNA for 36B4, a ribosomal protein used as an internal control for quantitation. N=4, data are expressed as mean $\pm$ SEM.

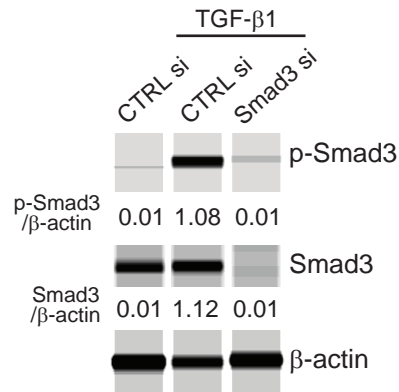

## Figure S7

**Smad3 antibody specificity testing by Smad3.** Primary dermal fibroblasts were transfected with non-specific control siRNA or Smad3 siRNA (400nM). 48 hours after transfection, cells were treated with TGF-β1 (ng/ml) for one hour and whole cell extract was prepared. Protein levels of phospho-Smad3 were determined by Capillary electrophoresis immunoassay and normalized to β-actin (loading control). Band intensities were quantified by Compass software. Bands show representative digital images.
